# Supplementary material
Source: PubMed Central journal article supplement (PMC3190719)

## Supporting Information

**Table S1. The gradient conditions in reverse phase-HPLC to separate methylation products catalyzed by WT-PRMT1 and the mutants.**

| Time(min) | Flow rate (ml/min) | Column Temperature (°C) | %A  | %B  |
|-----------|--------------------|-------------------------|-----|-----|
| 0         | 1.0                | 40                      | 100 | 0   |
| 15        | 1.0                | 40                      | 65  | 35  |
| 40        | 1.0                | 40                      | 60  | 40  |
| 41        | 1.0                | 40                      | 39  | 61  |
| 44.5      | 1.0                | 40                      | 0   | 100 |
| 54        | 1.0                | 40                      | 0   | 100 |

**Table S2. Data collection and refinement statistics for rat PRMT1 M48L. Values in parentheses correspond to those in the outer resolution shell**

|                                                       | Rat PRMT1 M48L     |
|-------------------------------------------------------|--------------------|
| Data collection                                       |                    |
| Beamline                                              | Home source        |
| Wavelength (Å)                                        | 1.5418             |
| Resolution range (Å)                                  | 28.35-2.20         |
| Outer shell (Å)                                       | 2.28-2.20          |
| No. of reflections                                    |                    |
| unique                                                | 27,377             |
| total                                                 | 130,736            |
| Average redundancy                                    | 4.8 (3.2)          |
| Mean I/σ(I)                                           | 8.9 (2.4)          |
| Completeness (%)                                      | 94.8 (68.0)        |
| R <sub>sym</sub> (%) <sup>a</sup>                     | 9.4 (43.7)         |
| Space group                                           | P4 <sub>1</sub> 22 |
| Unit cell dimensions<br>(a,b,c (Å); α=β=γ=90°)        | 87.3, 87.3, 143.29 |
| Refinement                                            |                    |
| R <sub>work</sub> /R <sub>free</sub> (%) <sup>b</sup> | 20.1/24.5          |
| Atoms in the structure                                |                    |
| protein                                               | 2545               |
| waters                                                | 204                |
| ligands/ions                                          | 27                 |
| Average B factors (Å <sup>2</sup> )                   |                    |
| protein                                               | 39.6               |
| water                                                 | 45.9               |
| rmsd bond (Å)/angle (°)                               | 0.008/1.124        |
| Protein geometry <sup>c</sup>                         |                    |
| Ramachandran outliers (%)                             | 0.0                |
| Ramachandran favored (%)                              | 96.5               |
| Rotamer outliers (%)                                  | 1.8                |

<sup>a</sup>  $R_{\text{sym}} = (\sum |I - \langle I \rangle|) / (\sum I)$ , where  $\langle I \rangle$  is the average intensity of multiple measurements.

<sup>b</sup>  $R_{\text{work}} = (\sum |F_{\text{obs}} - F_{\text{calc}}|) / (\sum |F_{\text{obs}}|)$  and is calculated using all data;  $R_{\text{free}}$  is the R-factor based on 5% of the data excluded from refinement.

<sup>c</sup> Ramachandran statistics were calculated using the MolProbity server (31).

**Table S3. The gradient conditions in reverse phase separation of mass spectrometry analysis of the R3 peptide products**

| Time | flow<br>$\mu\text{l}/\text{min}$ | %A | %B |
|------|----------------------------------|----|----|
| 0    | 0.8                              | 99 | 1  |
| 7.9  | 0.8                              | 99 | 1  |
| 8    | 0.6                              | 99 | 1  |
| 20   | 0.6                              | 70 | 30 |
| 21   | 0.6                              | 20 | 80 |
| 23   | 0.6                              | 20 | 80 |
| 24   | 0.8                              | 99 | 1  |

**Table S4. Steady-state kinetic activity of PRMT1 mutants with large-sized side chains with hnRNP K via ZipTip<sub>C4</sub> assay**

| PRMT1    | % activity of wtPRMT1 |
|----------|-----------------------|
| wt-PRMT1 | 100                   |
| M48F     | 3.0                   |
| M48Y     | 0.13                  |
| M48W     | 0.40                  |

**Figure S1. Representative 2.2 Å electron density observed at the PRMT1 M48L active site.  $2F_o - F_c$  maps are contoured at  $1\sigma$ .**

**Figure S2. HPLC analysis of amino acids contained in the R3 peptide.** Amino acids in the R3 peptide, Gly, Arg, and Phe, as well as MMA, ADMA, and SDMA standards were derivatized with OPA reagent and separated using RP-HPLC.

**Figure S3. Michaelis-Menten plots of PRMT1 mutants with the R3 peptide.** Proteins were assessed for activity using the R3 peptide. Various concentrations of R3 peptide [25-1000  $\mu\text{M}$ ] were used to initiate reactions containing 4  $\mu\text{M}$  mutant PRMT1, 250  $\mu\text{M}$  SAM, 10 nM MTA nucleosidase, 10  $\mu\text{M}$   $\text{MnSO}_4$ , and 50 mM  $\text{NaPO}_4$  buffer pH 7.1 at 37 °C. Reactions were performed at least in duplicate, and initial reaction rates were used to assess protein activity. Michaelis-Menten plots for M155A and M48L with the R3 peptide are shown.

**Figure S4. Modified Stern-Volmer plot showing the intrinsic fluorescent quenching of PRMT1 by R3 and AdoMet.** The data was fit to a line with nonlinear regression where the  $y_{\text{intercept}} = 1/fa$ , the slope =  $1/fa * K_Q$  and the  $K_Q = 1/K_D$ .

**Figure S5. HPLC analysis of automethylated M48L after an 8-hr automethylation reaction.** Modified M48L protein was hydrolyzed, and the resulting amino acids were derivatized with OPA reagent and separated using RP-HPLC. Tritiated AdoMet was used as a tracer and peaks were identified as in Figure 2.

**Figure S6. MS/MS data for the first methylation of the R3 peptide.**

**Figure S1.**

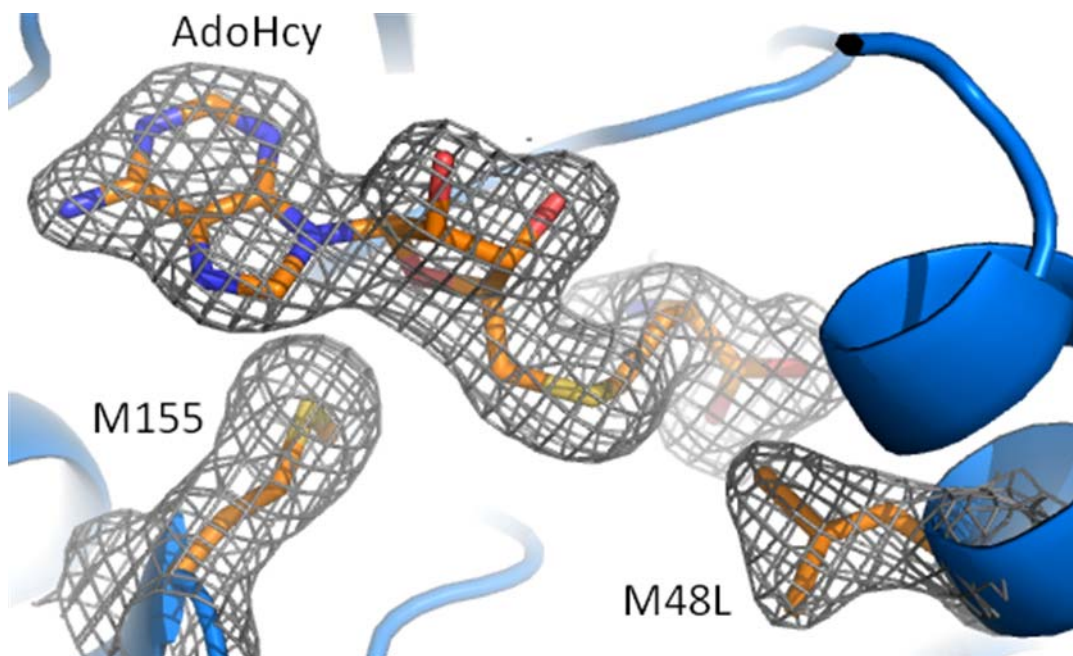

Figure S2.

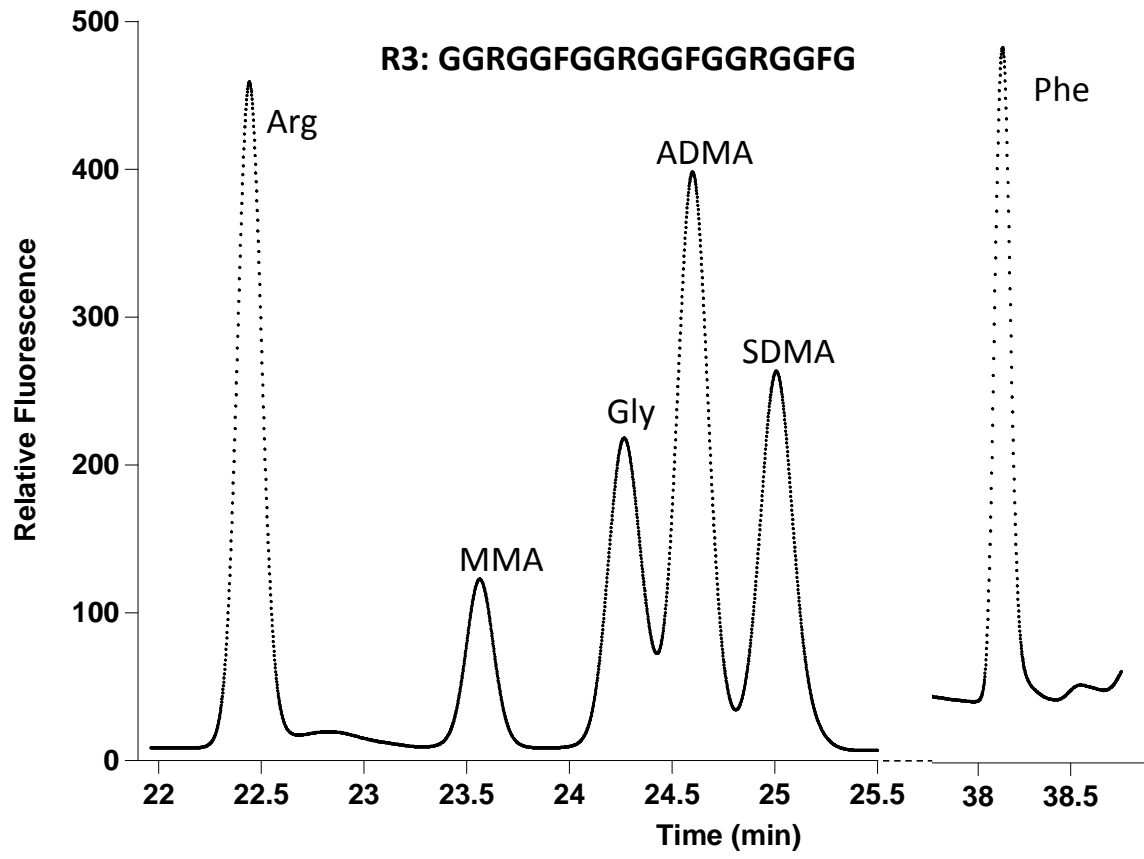

Figure S3.

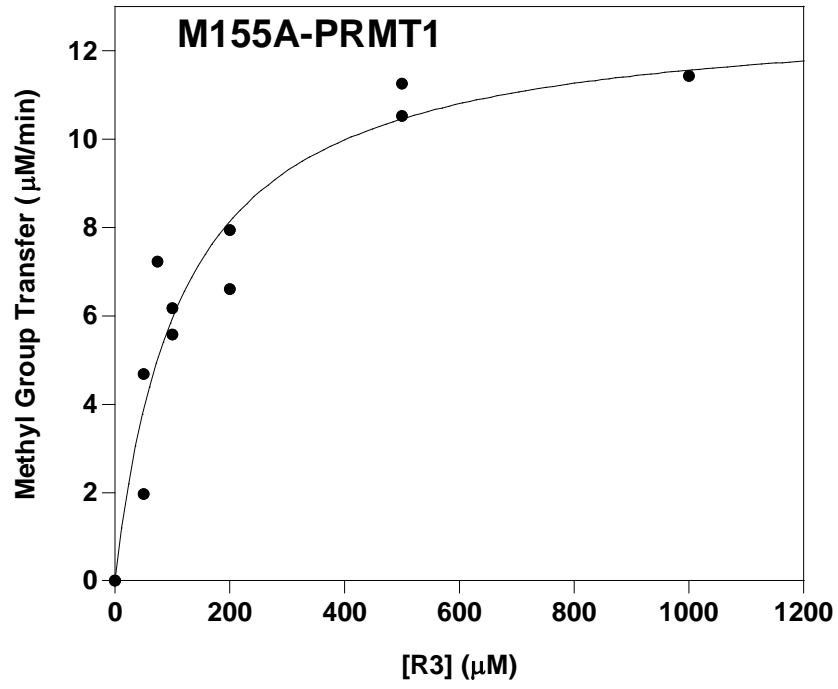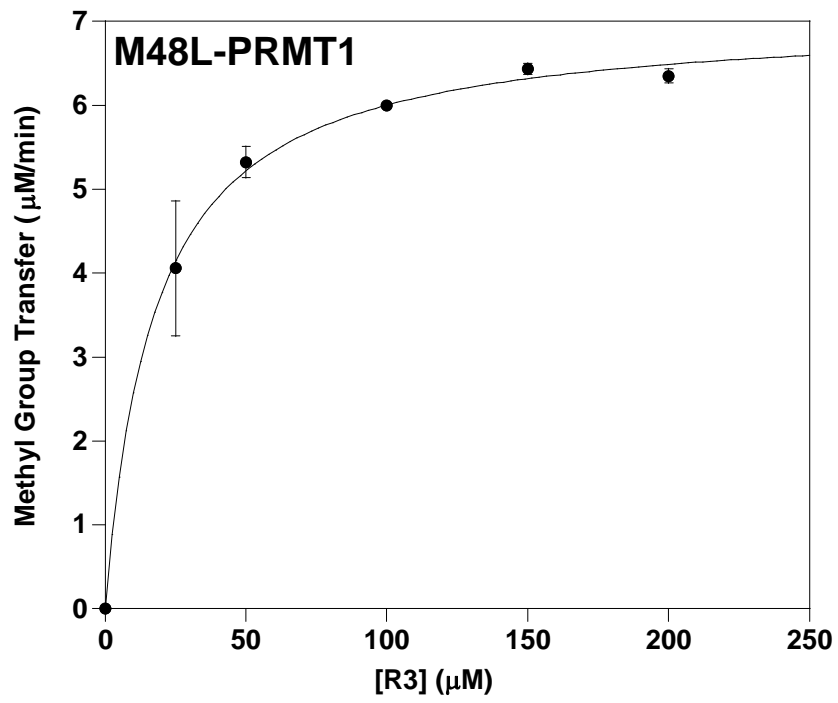

Figure S4.

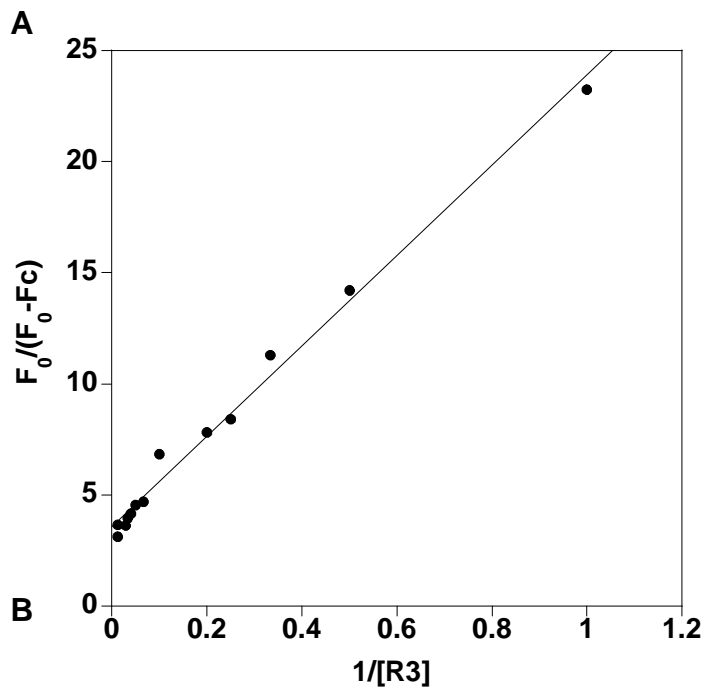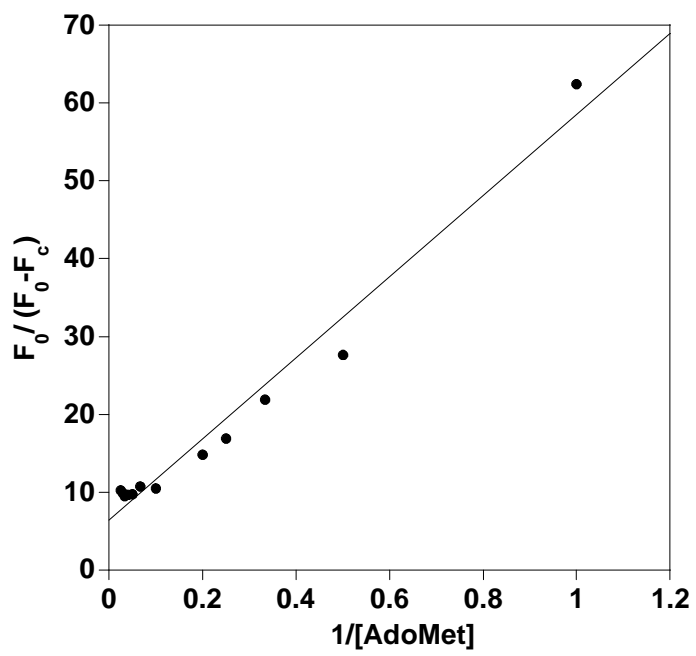



Figure S5.

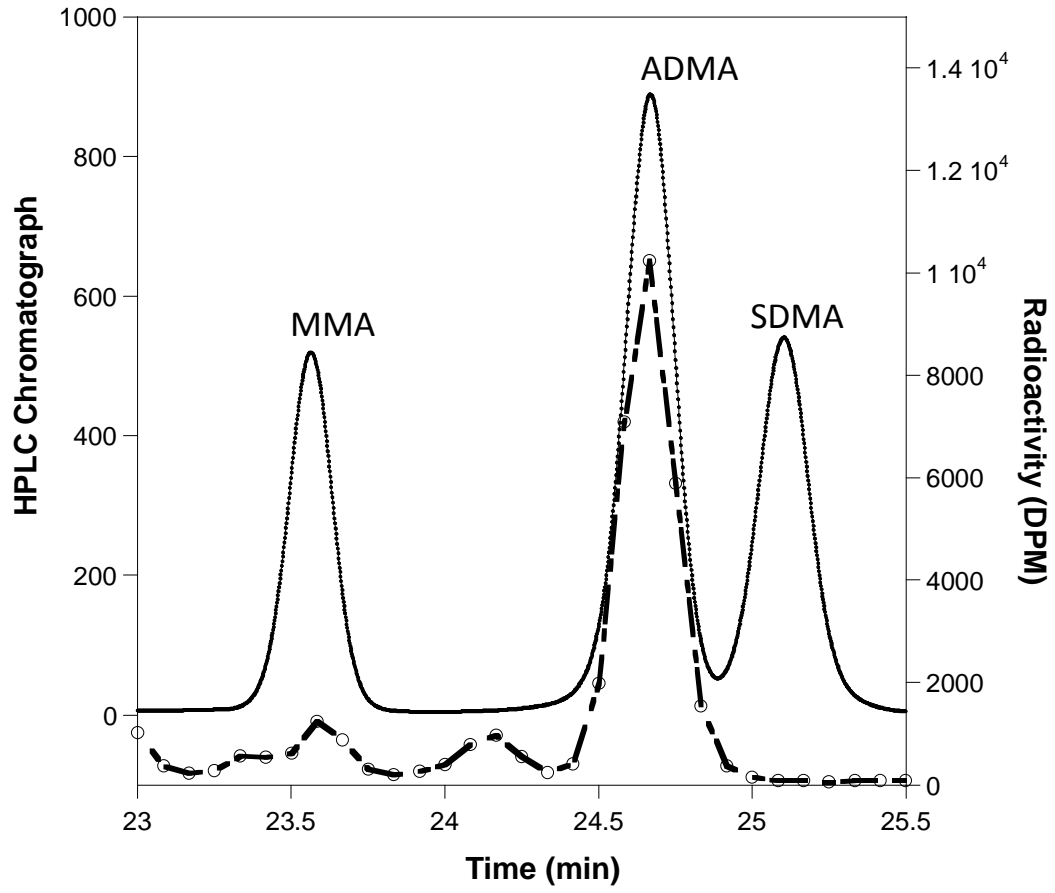

Figure S6.

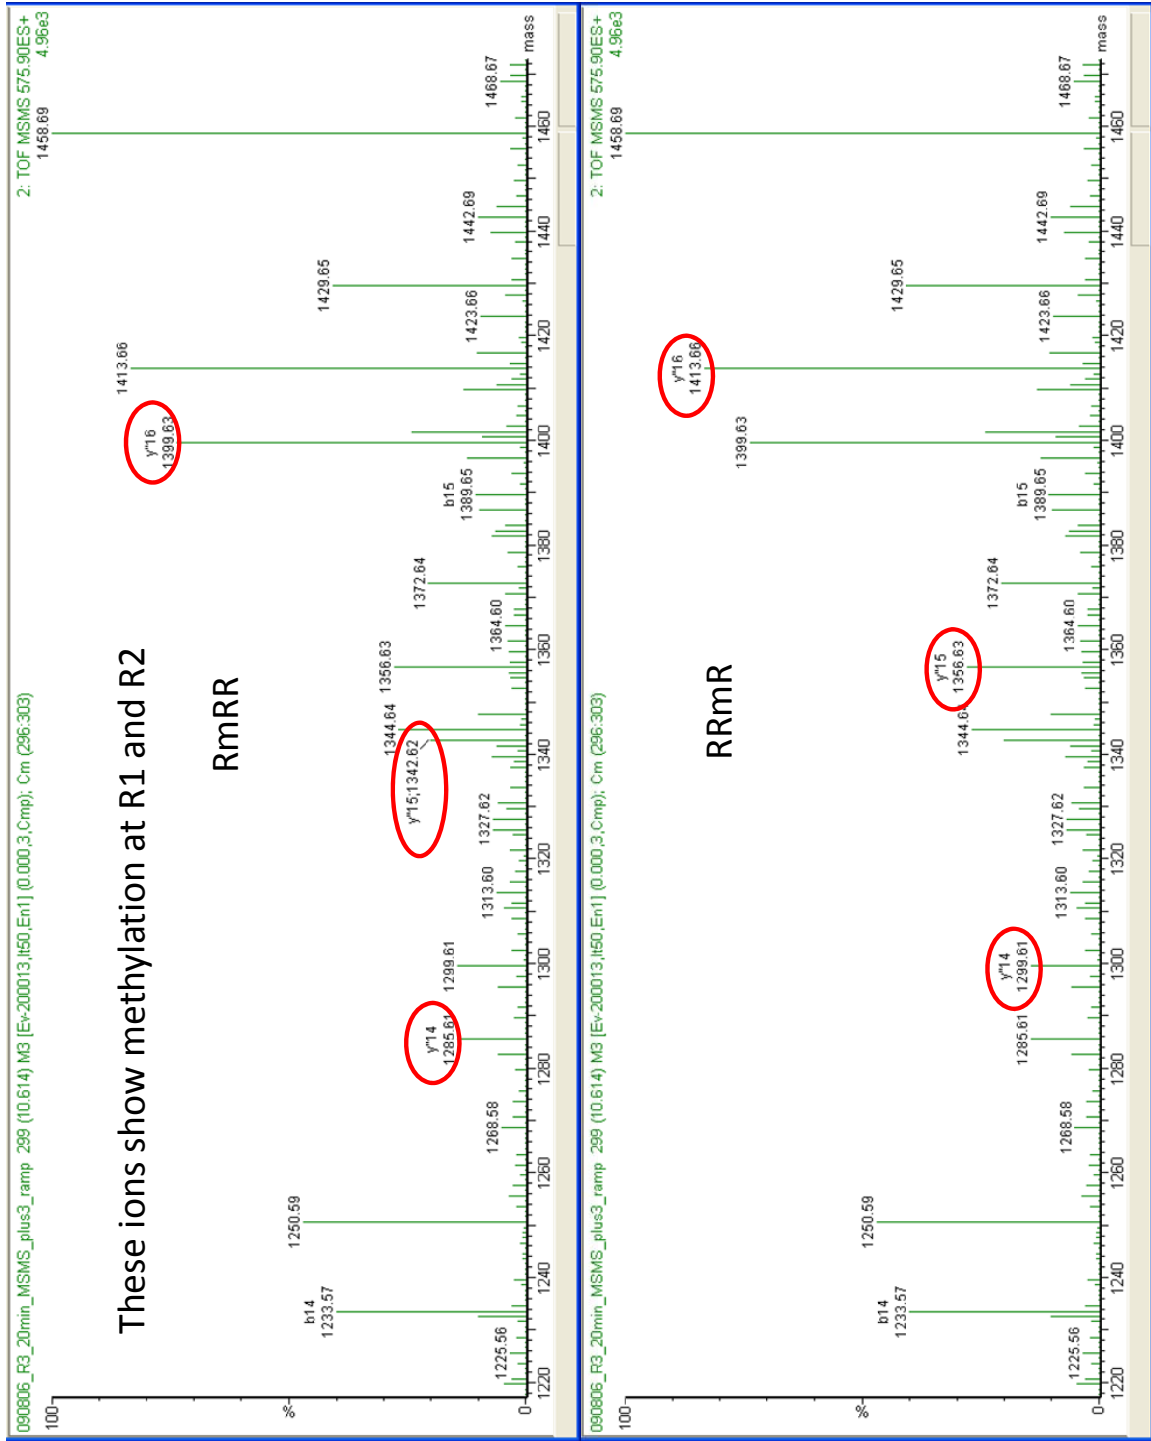

Supplement: supp_M111.224097_jbc.M111.224097-1.pdf [file supp_M111.224097_jbc.M111.224097-1.pdf]
